# Supplementary material for: Association of Public Sports Space Perception with Health-Related Quality of Life in Middle-Aged and Older Adults—Evidence from a Survey in Shandong, China
Source: MDPI journal article supplement (doi:10.3390/bs13090736), 2023-09-04
Supplement: s1 [file s1]

# Supplementary Material

## Supplement 1:

**Table S1:** The characteristic of the study population (N = 869).

|                       | Variables                                          | Number | Percent(%) |
|-----------------------|----------------------------------------------------|--------|------------|
| Sex                   | Male                                               | 401    | 46.19      |
|                       | Female                                             | 468    | 53.81      |
| Living situation      | Live by yourself                                   | 244    | 28.06      |
|                       | Only live with children                            | 507    | 58.38      |
|                       | Only live with their parents                       | 107    | 12.29      |
|                       | While living with their children and their parents | 11     | 1.27       |
|                       | rural area                                         | 350    | 40.30      |
| living environment    | city                                               | 387    | 44.57      |
|                       | town center                                        | 41     | 4.73       |
|                       | Urban and rural areas or township combined areas   | 87     | 10.05      |
|                       | special area                                       | 3      | 0.35       |
|                       | Native community                                   | 267    | 30.71      |
| The type of community | Restructuring community                            | 50     | 5.73       |
|                       | New community                                      | 201    | 23.18      |
|                       | Village and town self-built houses                 | 317    | 36.53      |
|                       | Other types                                        | 33     | 3.85       |
| Smoking               | Quit smoking                                       | 97     | 11.20      |
|                       | Always smoking                                     | 143    | 16.51      |
|                       | Never smoked                                       | 628    | 72.29      |
|                       | more than once a month                             | 265    | 30.48      |
| Drinking              | Less than once a month                             | 135    | 15.59      |
|                       | Don't drink anything                               | 469    | 53.93      |
| Disease               | 0                                                  | 409    | 47.11      |
|                       | 1                                                  | 179    | 20.55      |
|                       | 2                                                  | 106    | 12.24      |
|                       | 3                                                  | 72     | 8.31       |
|                       | ≥4                                                 | 40     | 4.62       |

Supplement 2:

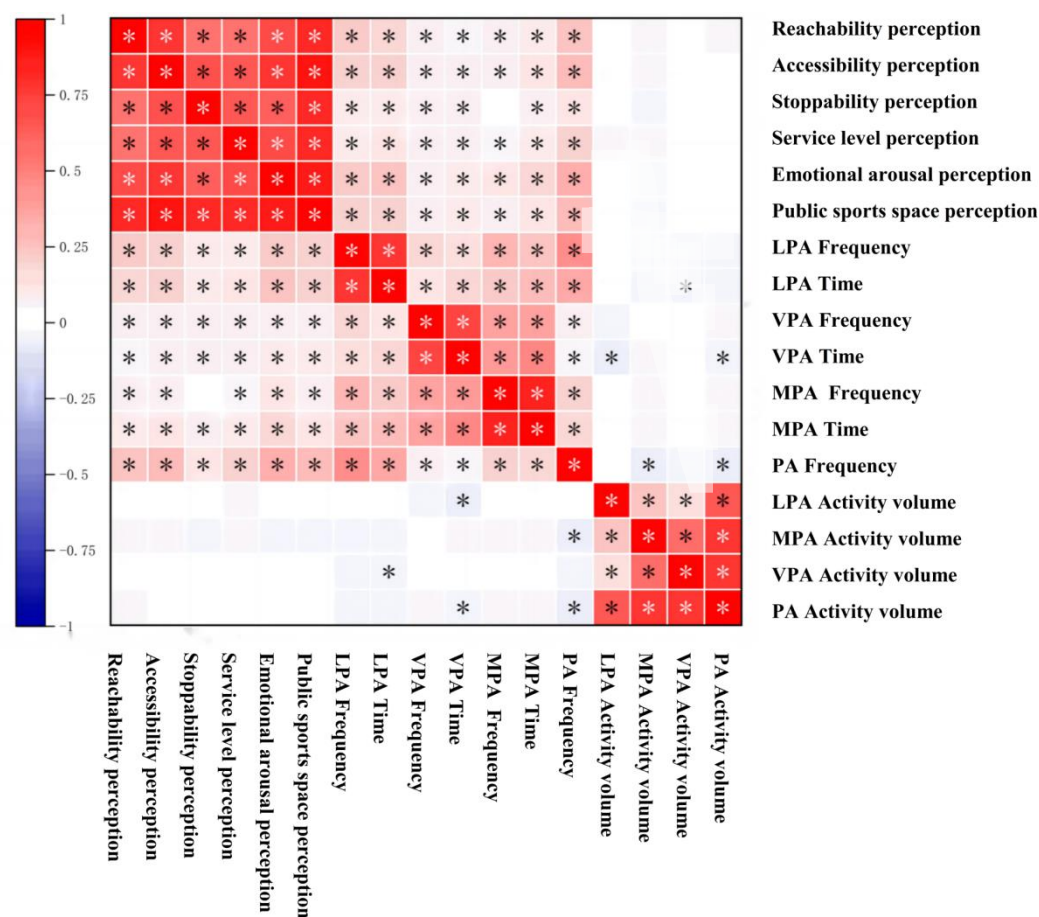

**Figure S1:** Correlation analysis of public sports space perception and physical activity-related variables. \* $p < 0.001$ . Light-intensity PA (LPA), moderate-intensity PA (MPA), vigorous-intensity PA (VPA).

## Supplement 3:

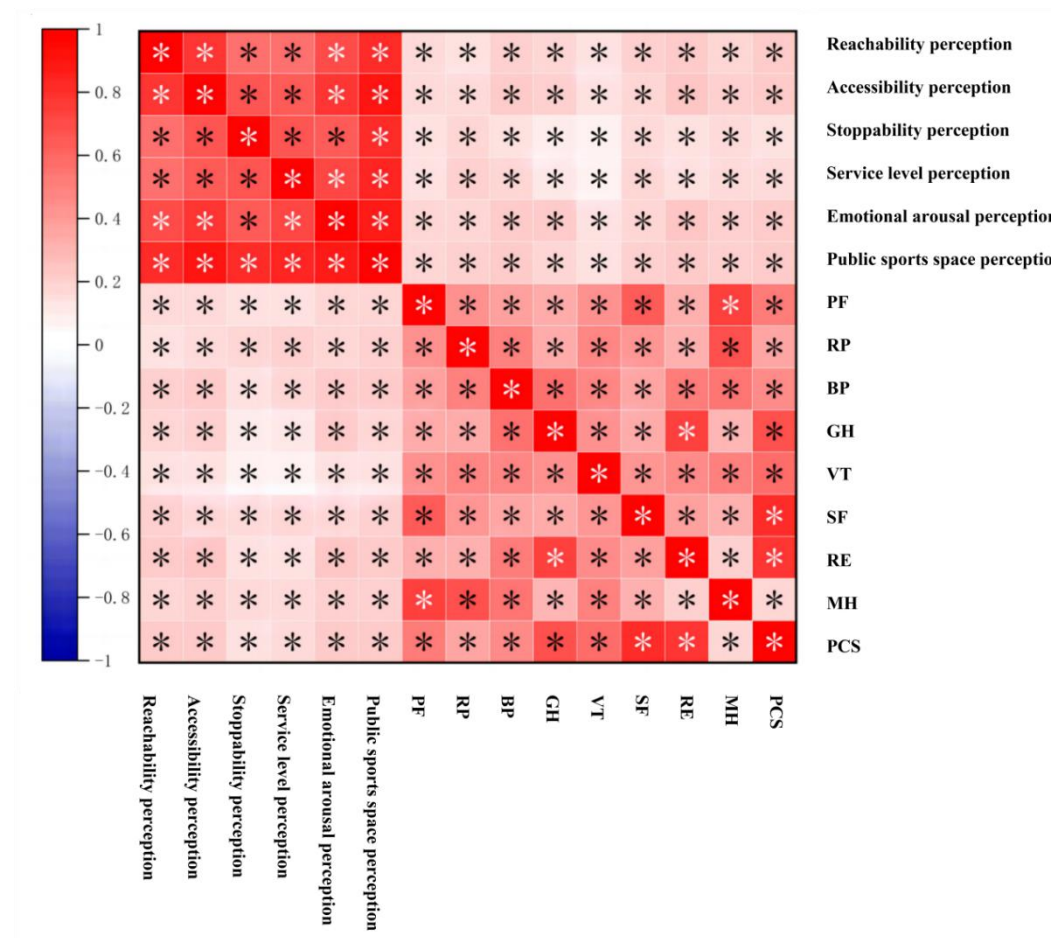

**Figure S2:** Correlation analysis of public sports space perception and variables related to health-related quality of life.\*p<0.001.physical function (PF), role-body (RP), body pain (BP), general health (GH), vitality (VT), social functioning (SF), role-emotion (RE), and mental health (MH).

## Supplement 4:

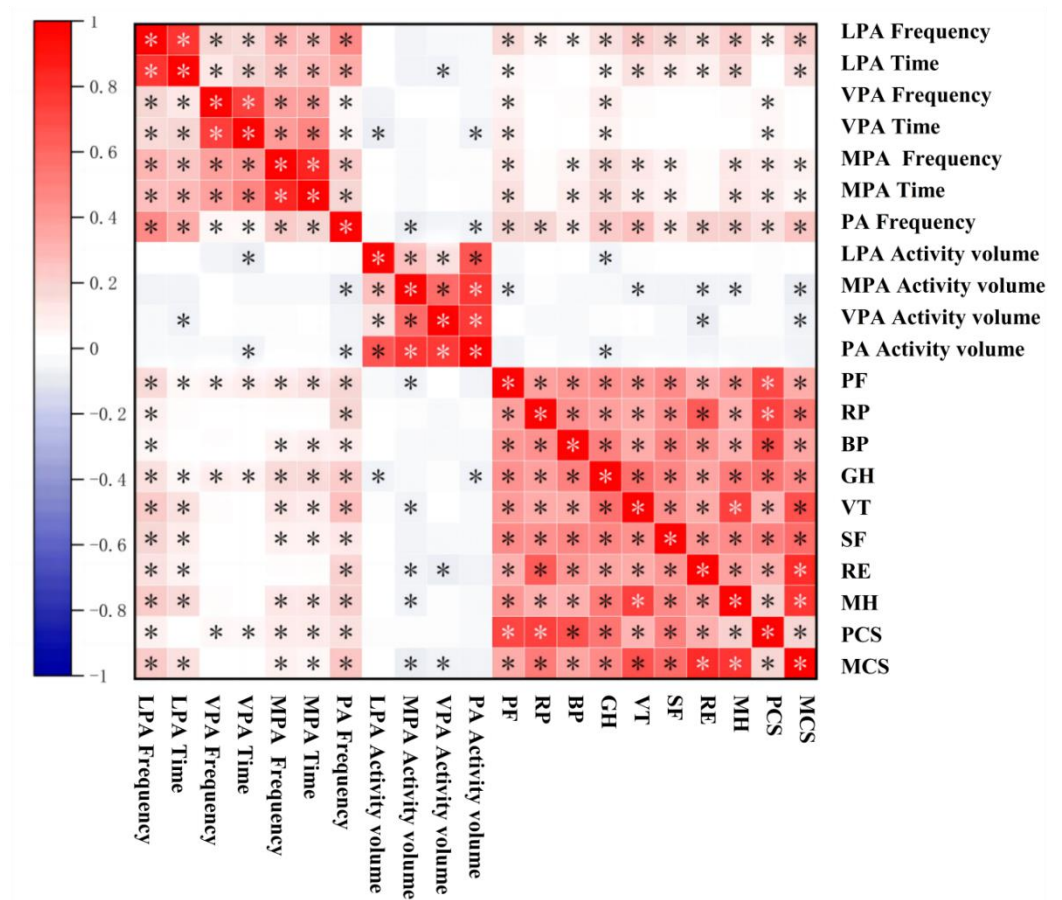

**Figure S3:** Correlation analysis of physical exercise activity and health-related QoL-related variables.\*p<0.001. physical function (PF), role–body (RP), body pain (BP), general health (GH), vitality (VT), social functioning (SF), role–emotion (RE), and mental health (MH). Light-intensity PA (LPA), moderate-intensity PA (MPA), vigorous-intensity PA (VPA).

## Supplement 5:

**Table S2:** Regression analysis of public sports space perception and analysis of various dimensions on physical activity.

| Variables       |     | Reachability perception | Accessibility perception | Stoppability perception | Service level perception | Emotional arousal perception | Public sports space perception |
|-----------------|-----|-------------------------|--------------------------|-------------------------|--------------------------|------------------------------|--------------------------------|
| Time            | LPA | -0.003                  | 0.009                    | -0.012                  | -0.035**                 | 0.054**                      | 0.013**                        |
|                 | VPA | -0.01                   | 0.001                    | -0.004                  | -0.005                   | 0.02                         | 0.003*                         |
|                 | MPA | -0.006                  | -0.008                   | -0.019                  | -0.001                   | 0.038**                      | 0.005**                        |
| Frequency       | LPA | 0.059                   | -0.007                   | -0.043                  | -0.117**                 | 0.138**                      | 0.030**                        |
|                 | VPA | 0.001                   | -0.005                   | -0.009                  | -0.001                   | 0.019                        | 0.005*                         |
|                 | MPA | 0.009                   | -0.034                   | -0.03                   | -0.009                   | 0.070**                      | 0.006*                         |
| Activity volume | LPA | 0.004                   | -0.002                   | 0.015                   | -0.017                   | 0.001                        | 0.001                          |
|                 | VPA | -0.026                  | 0.029                    | 0.001                   | 0.006                    | -0.01                        | 0.003                          |
|                 | MPA | -0.001                  | 0.014                    | -0.005                  | 0.008                    | -0.019                       | -0.003                         |
|                 | All | 0.006                   | 0.011                    | -0.043**                | -0.032*                  | 0.078**                      | 0.019**                        |

\* p<0.05, \*\* p<0.01.

## Supplement 6:

**Table S3:** Regression analysis of public sports space perception and each dimension of health-related quality of life and its various dimensions.

| Variables | Reachability perception | Accessibility perception | Stoppability perception | Service level perception | Emotional arousal perception | Public sports space perception |
|-----------|-------------------------|--------------------------|-------------------------|--------------------------|------------------------------|--------------------------------|
| PF        | 0.437                   | -0.164                   | -0.213                  | -0.826**                 | 0.979**                      | 0.213**                        |
| RP        | 0.333                   | -0.565                   | -0.331                  | 0.007                    | 0.814                        | 0.259**                        |
| BP        | -0.235                  | -0.366                   | 0.044                   | 0.297                    | 0.392                        | 0.132**                        |
| GH        | 0.125                   | -0.066                   | -0.665**                | 0.110                    | 0.662*                       | 0.166**                        |
| VT        | -0.096                  | 0.301                    | -0.558**                | -0.280                   | 0.768**                      | 0.136**                        |
| SF        | 0.092                   | 0.162                    | -0.342                  | -0.436                   | 0.621                        | 0.097**                        |
| RE        | 0.838                   | -0.495                   | 0.102                   | 0.261                    | -0.387                       | 0.319**                        |
| MH        | 0.109                   | 0.273                    | -0.350                  | -0.466*                  | 0.599*                       | 0.166**                        |
| PCS       | 0.014                   | -0.166                   | -0.103                  | -0.064                   | 0.377**                      | 0.059**                        |
| MCS       | 0.211                   | 0.092                    | -0.154                  | -0.150                   | 0.132                        | 0.131**                        |

\* p<0.05, \*\* p<0.01.physical function (PF), role–body (RP), body pain (BP), general health (GH), vitality (VT), social functioning (SF), role–emotion (RE), and mental health (MH).

## Supplement 7:

**Table S4:** Regression analysis of physical exercise activities on health-related quality of life and its various dimensions.

| Variables | Time   |        |         | Frequency |        |        | all     |
|-----------|--------|--------|---------|-----------|--------|--------|---------|
|           | LPA    | VPA    | MPA     | LPA       | VPA    | MPA    |         |
| PF        | -1.254 | 2.477  | 1.489   | 1.618**   | -0.266 | -1.314 | 2.724** |
| RP        | 1.004  | 1.148  | -2.689  | 0.132     | -0.774 | 0.548  | 4.783** |
| BP        | 0.191  | 2.985* | -2.968  | 0.357     | -0.48  | 0.534  | 1.362*  |
| GH        | -0.694 | 1.767  | -0.506  | 0.669     | 0.646  | 0.061  | 3.132** |
| VT        | -0.112 | 0.861  | -1.751  | 0.932**   | 0.227  | 0.085  | 2.760** |
| SF        | -0.169 | 1.393  | -2.189* | 1.441**   | 0.071  | -0.179 | 1.044   |
| RE        | -0.639 | 0.39   | -0.605  | 1.269     | -0.533 | -0.171 | 4.195** |
| MH        | 0.561  | 0.844  | -3.341* | 0.780*    | 0.565  | 0.608  | 1.562** |
| PCS       | -0.151 | 1.119* | -0.11   | 0.232*    | -0.254 | -0.14  | 1.109** |
| MCS       | 0.083  | 0.219  | -1.709  | 0.715**   | 0.133  | 0.231  | 1.526** |

\* p<0.05, \*\* p<0.01. physical function (PF), role–body (RP), body pain (BP), general health (GH), vitality (VT), social functioning (SF), role–emotion (RE), and mental health (MH).

## Supplement 8:

### 1.Variance Analysis

#### 1.1 Analysis of perceived age differences in public sports space among community elderly people

The results of variance analysis showed that there were significant differences in accessibility perception, suitability perception and sports space perception among different age groups, with p-values of 0.005, 0.000 and 0.035, respectively. This means that there are obvious differences in the perception of accessibility, stoppability and overall perception of public sports space among respondents in different age groups. The p-values of reachability, emotional arousal perception and service level perception were all greater than 0.05, indicating that there was no significant difference in the perception scores of service level perception among different age groups.

**Table S5:** The current situation of public sports space perception for the middle-aged and older adults

| Variables                      | Age (Mean±SD) |             |             |             | F     | p       |
|--------------------------------|---------------|-------------|-------------|-------------|-------|---------|
|                                | All           | 40-59       | 60-69       | 70-80       |       |         |
| Reachability perception        | 3.679±0.975   | 3.641±0.983 | 3.683±0.968 | 3.585±1.113 | 1.921 | 0.125   |
| Accessibility perception       | 3.689±0.952   | 3.647±0.947 | 3.688±0.963 | 3.508±1.040 | 4.336 | 0.005** |
| Stoppability perception        | 3.405±1.052   | 3.398±1.107 | 3.288±1.033 | 3.055±0.905 | 7.727 | 0.000** |
| Service level perception       | 3.280±1.079   | 3.213±1.105 | 3.355±1.050 | 3.090±1.045 | 2.368 | 0.069   |
| Emotional arousal perception   | 3.656±0.954   | 3.618±0.951 | 3.688±0.970 | 3.700±1.005 | 0.261 | 0.853   |
| Public sports space perception | 3.542±0.864   | 3.503±0.872 | 3.541±0.878 | 3.388±0.835 | 2.883 | 0.035*  |

\* p<0.05, \*\* p<0.01.

#### 1.2 The status and age difference of the elderly in the community

The results of variance analysis showed that there were significant differences in the participation time of LPA (p<0.01) and VPA (p<0.01) among middle-aged and older adults people in different age groups. The mean values of participation time of LPA for the early old age group aged 40-59, the middle-aged and older adults group aged 60-69, and the middle-aged and older adults group aged 70-80 were 1.820, 2.361, and 2.283, respectively. The mean values of participation time of VPA for the three groups were 1.211, 1.095, and 1.019, respectively. However, there was no significant difference in the participation time of MPA among middle-aged and older adults people in different age groups (p>0.05). In terms of participation frequency, there were significant differences in the participation frequency of LPA (p<0.01) and VPA (p<0.01) among middle-aged and older adults in different age groups. The mean values of participation frequency of LPA for the three groups were 1.960, 3.120, and 3.179, respectively. The mean values of participation frequency of VPA for the three groups were 0.411, 0.177, and 0.066, respectively. However, there was no significant difference in the participation frequency of MPA among middle-aged and older adults in different age groups (p>0.05). In terms of physical exercise activity volume, there were significant differences in the activity volume of LPA (p<0.01) among middle-aged and older adults in different age groups. The mean values of activity volume of LPA for the three groups were -0.121, 0.431, and 0.486, respectively. The mean values of activity volume of VPA for the three groups were 0.054, -0.099, and -0.170, respectively. However, there was no significant difference in the



activity volume of MPA among middle-aged and older adults in different age groups ( $p>0.01$ ). Generally speaking, there were significant differences in the total physical exercise activity volume among middle-aged and older adults in different age groups ( $p<0.05$ ).

**Table S6:** Current situation and age difference of physical activities

| Variables       |     | Age (Mean±SD) |              |              |              | F      | p       |
|-----------------|-----|---------------|--------------|--------------|--------------|--------|---------|
|                 |     | All           | 40-59        | 60-69        | 70-80        |        |         |
| Time            | LPA | 1.976±1.113   | 1.82±1.028   | 2.361±1.217  | 2.283±1.217  | 20.212 | 0.000** |
|                 | VPA | 1.166±0.593   | 1.211±0.661  | 1.095±0.462  | 1.019±0.194  | 6.222  | 0.002** |
|                 | MPA | 1.266±0.751   | 1.268±0.744  | 1.323±0.824  | 1.170±0.669  | 1.325  | 0.266   |
| frequency       | LPA | 2.321±2.776   | 1.960±2.577  | 3.120±2.959  | 3.179±3.153  | 17.324 | 0.000** |
|                 | VPA | 0.326±1.187   | 0.411±1.329  | 0.177±0.778  | 0.066±0.680  | 5.374  | 0.005** |
|                 | MPA | 0.517±1.505   | 0.502±1.453  | 0.677±1.716  | 0.358±1.449  | 1.514  | 0.221   |
| activity volume | LPA | 0.054±1.028   | -0.121±0.819 | 0.431±1.240  | 0.486±1.410  | 30.660 | 0.000** |
|                 | VPA | -0.002±0.995  | 0.054±1.133  | -0.099±0.629 | -0.170±0.395 | 3.238  | 0.040*  |
|                 | MPA | 0.025±1.053   | 0.017±1.061  | 0.093±1.086  | -0.031±0.964 | 0.498  | 0.608   |
|                 | All | 0.035±1.024   | -0.026±1.069 | 0.196±0.966  | 0.142±0.802  | 3.616  | 0.027*  |

\*  $p<0.05$ , \*\*  $p<0.01$ .

### 1.3 Status and age differences of health-related quality of life among the elderly in the community

The results of variance analysis showed that there were significant differences in physical function, bodily pain, general health, social function and body composition score among middle-aged and older adults in different age groups ( $p<0.01$ ). The mean values of physical function for the early old age group aged 40-59, the middle-aged and older adults group aged 60-69, and the middle-aged and older adults group aged 70-80 were 83.552, 69.185, and 63.548, respectively. The mean values of bodily pain for the three groups were 84.268, 78.232, and 70.710, respectively. The mean values of general health for the three groups were 71.539, 63.446, and 61.032, respectively. The mean values of social function for the three groups were 83.346, 79.403, and 70.645, respectively. The mean values of body composition score for the three groups were 53.230, 48.378, and 46.032, respectively. However, there was no significant difference in role physical, vitality, role emotional, mental health and psychological component score among middle-aged and older adults people in different age groups ( $p>0.05$ ). Generally speaking, the age difference was more reflected in the physical performance of health-related quality of life, and the impact on psychology was not significant.

**Table S7:** Status and age differences of health-related quality of life

| Variables | Age (Mean±SD) |               |               |               | F      | p       |
|-----------|---------------|---------------|---------------|---------------|--------|---------|
|           | All           | 40-59         | 60-69         | 70-80         |        |         |
| PF        | 78.990±21.309 | 83.552±18.801 | 69.185±23.002 | 63.548±22.516 | 52.087 | 0.000** |
| RP        | 81.611±34.721 | 83.153±33.759 | 78.326±36.142 | 75.806±41.071 | 2.072  | 0.127   |
| BP        | 82.177±18.883 | 84.268±17.819 | 78.232±19.658 | 70.710±24.243 | 14.951 | 0.000** |
| GH        | 68.986±19.975 | 71.539±19.912 | 63.446±19.211 | 61.032±16.903 | 16.909 | 0.000** |
| VT        | 69.417±17.071 | 69.925±17.563 | 68.305±15.86  | 67.258±15.960 | 1.008  | 0.365   |
| SF        | 81.742±19.879 | 83.346±19.132 | 79.403±20.245 | 70.645±26.005 | 8.532  | 0.000** |
| RE        | 81.255±35.064 | 0.054±1.028   | -0.121±0.819  | 0.431±1.240   | 0.095  | 0.910   |
| MH        | 70.314±16.132 | 70.589±16.675 | 69.906±14.683 | 68.516±16.19  | 0.353  | 0.702   |
| PCS       | 51.691±8.308  | 53.230±7.465  | 48.378±8.888  | 46.032±9.607  | 39.301 | 0.000** |
| MCS       | 43.01±12.994  | 42.709±13.359 | 43.867±12.156 | 42.581±11.837 | 0.685  | 0.504   |

\*  $p<0.05$ , \*\*  $p<0.01$ . physical function (PF), role-body (RP), body pain (BP), general health (GH), vitality (VT), social functioning (SF), role-emotion (RE), and mental health (MH).
